# Supplementary material for: Maternal pomegranate juice intake and brain structure and function in infants with intrauterine growth restriction: A randomized controlled pilot study
Source: PubMed Central journal article supplement (PMC6703683; doi:10.1371/journal.pone.0219596), 2019-08-21

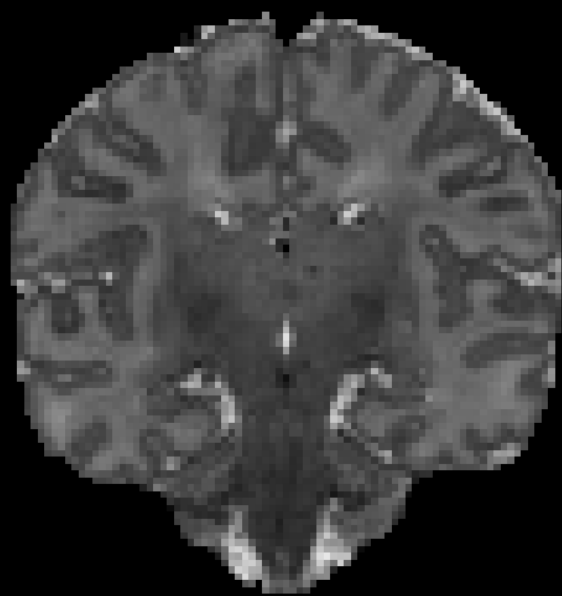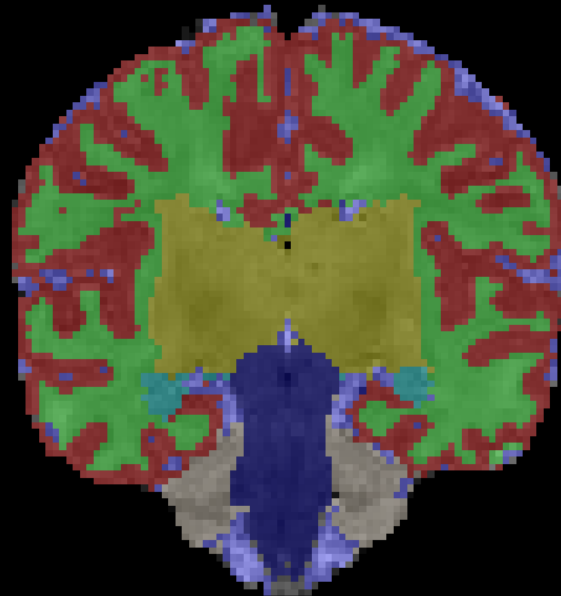

Supplement: pone.0219596.s002.pdf [file pone.0219596.s002.pdf]
