# Supplementary material for: Maternal pomegranate juice intake and brain structure and function in infants with intrauterine growth restriction: A randomized controlled pilot study
Source: PubMed Central journal article supplement (PMC6703683; doi:10.1371/journal.pone.0219596), 2019-08-21
Supplement: pone.0219596.s004.pdf [file pone.0219596.s004.pdf]

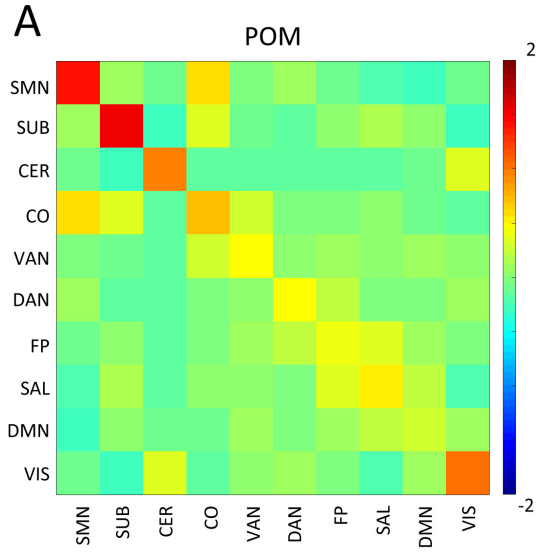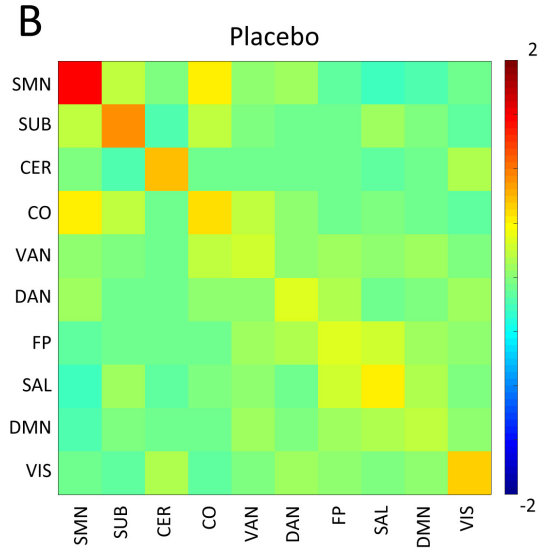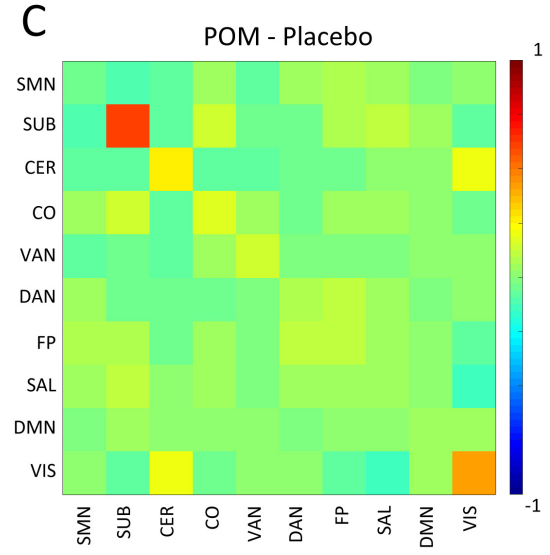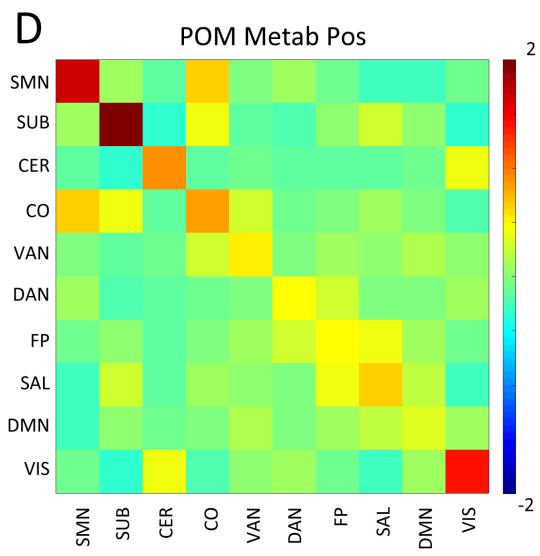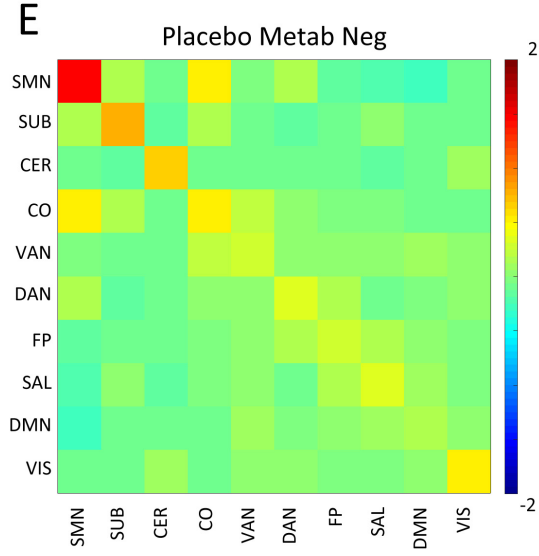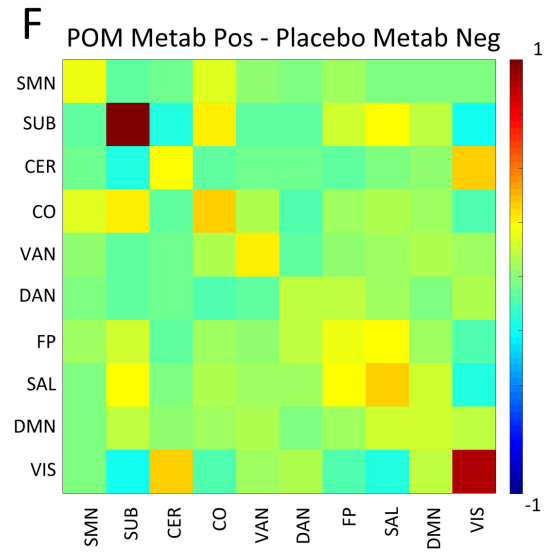

**S2 Figure. Relationships between maternal pomegranate juice intake and infant fcMRI measures (network average covariance).**

Composite mean covariance matrices are shown representing averages over ROI pairs within each network (*Top, A-C*) Treatment vs. placebo (modified intention-to-treat analysis). (A) Infants in treatment (pomegranate juice) group and (B) infants in placebo group at term-equivalent. (C) Shows the difference between groups (treatment minus placebo). (*Bottom, D-F*) Metabolite-positive treatment vs. metabolite-negative placebo (per-protocol analysis). (D) Infants in metabolite-positive treatment group and (E) infants in metabolite-negative placebo group at term-equivalent. (F) Shows the difference between groups (metabolite-positive treatment minus metabolite-negative placebo). Note metabolite-positive treatment > metabolite-negative placebo network average covariance within subcortical and visual networks. CER - cerebellar; CO - cingulo-opercular; DAN – dorsal attention network; DMN – default mode network; FP – frontal parietal network; LAN – language area network; Metab – metabolite; Neg – negative; POM – pomegranate; Pos – positive; SAL – salience network; SMN – sensorimotor network; SUB – subcortical grey matter; VAN – ventral attention network; VIS – visual network.
